# Supplementary material for: Molecular design and anti-melanoma activity of a novel bullfrog antibacterial peptide RGD-chimera
Source: PubMed Central journal article supplement — Oncol Lett. 2020 Dec 15;21(2):115. doi: 10.3892/ol.2020.12376 (PMC7751474; doi:10.3892/ol.2020.12376), 2020-12-15

Figure S1. Tissue of nude mice in T-La (S) peptide injection group. Tissue of the (A) liver, (B) heart, (C) lung, (D) kidney and (E) spleen tissue. Scale bar, 60  $\mu$ m.

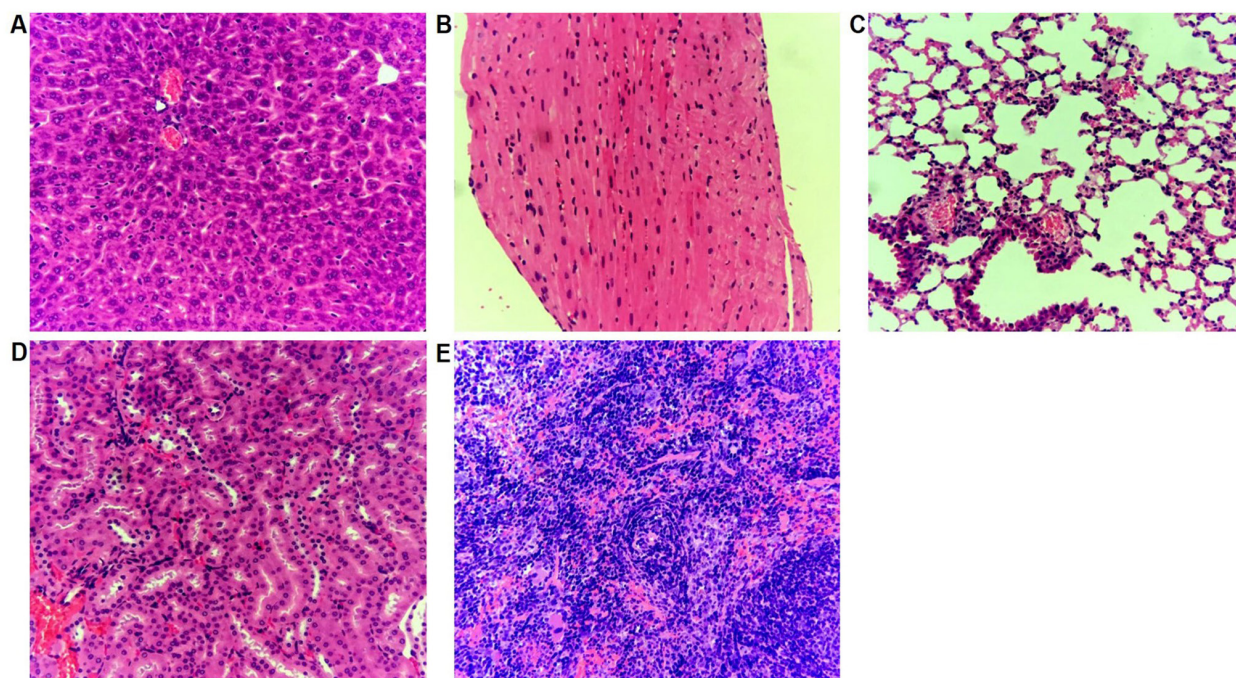

Figure S2. Tissue of nude mice in T-La (FS) peptide injection group. Tissue of the (A) liver tissue, (B) heart, (C) lung, (D) kidney and (E) spleen tissue. Scale bar, 60  $\mu\text{m}$ .

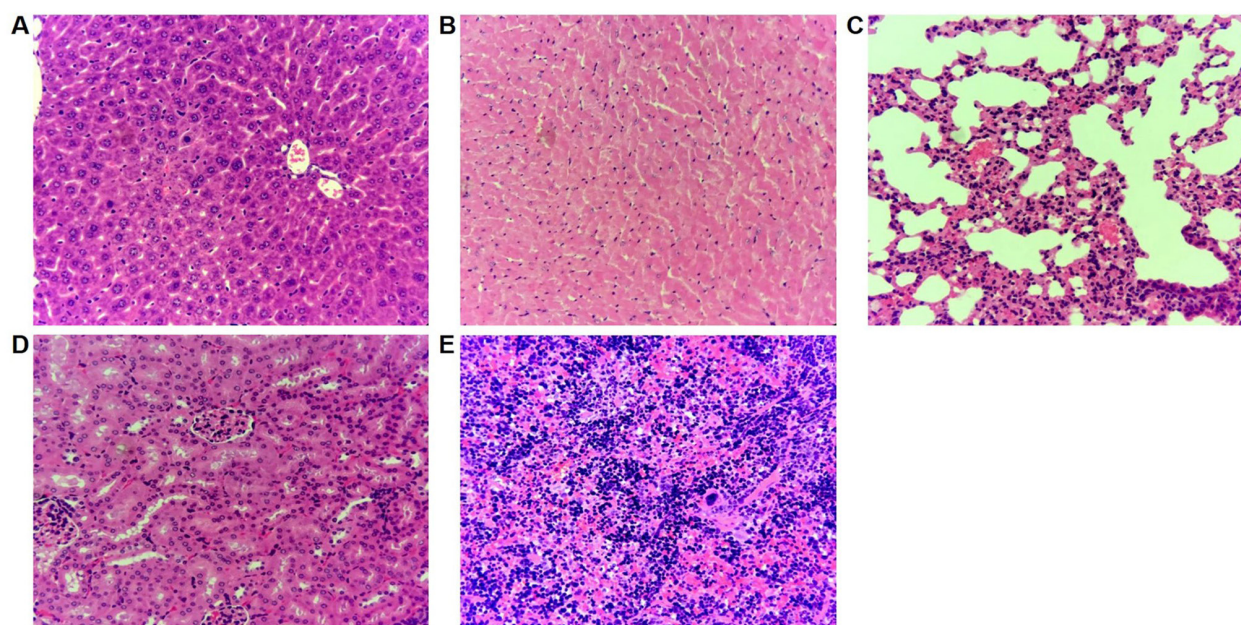

Figure S3. Tissue of nude mice in RGD-T-La (S) peptide injection group. Tissue of the (A) liver, (B) heart, (C) lung, (D) kidney and (E) spleen tissue. Scale bar, 60  $\mu\text{m}$ .

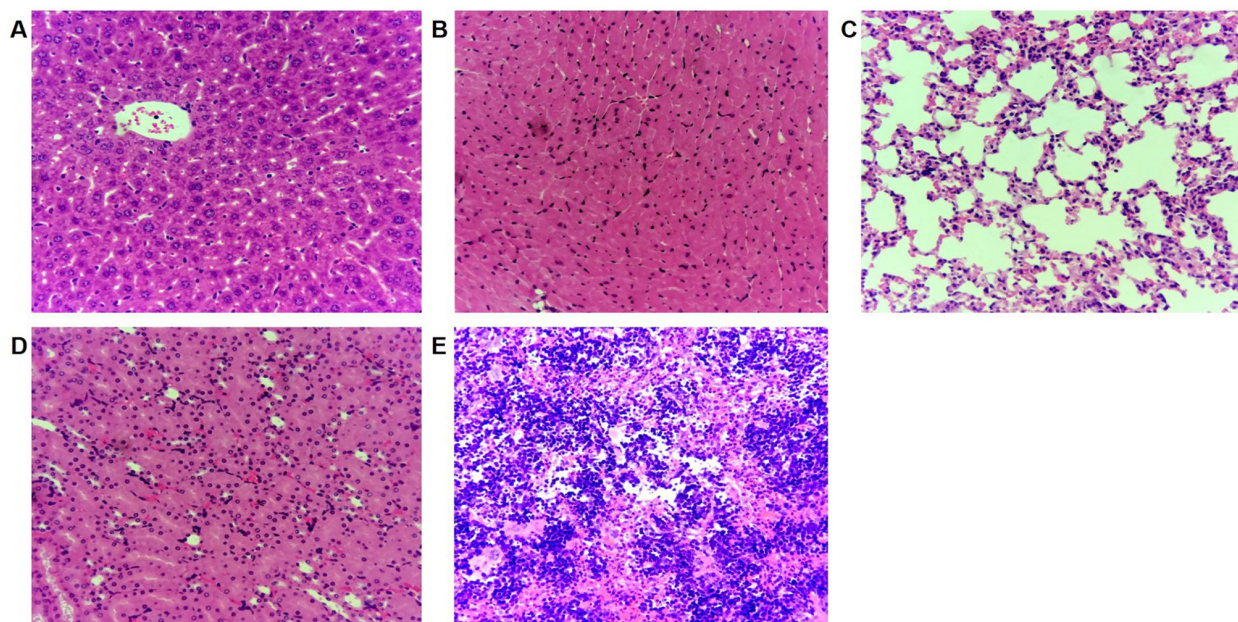

Figure S4. Tissue of nude mice in RGD-T-La (FS) peptide injection group. Tissue of the (A) liver, (B) heart, (C) lung, (D) kidney and (E) spleen tissue. Scale bar, 60  $\mu\text{m}$ .

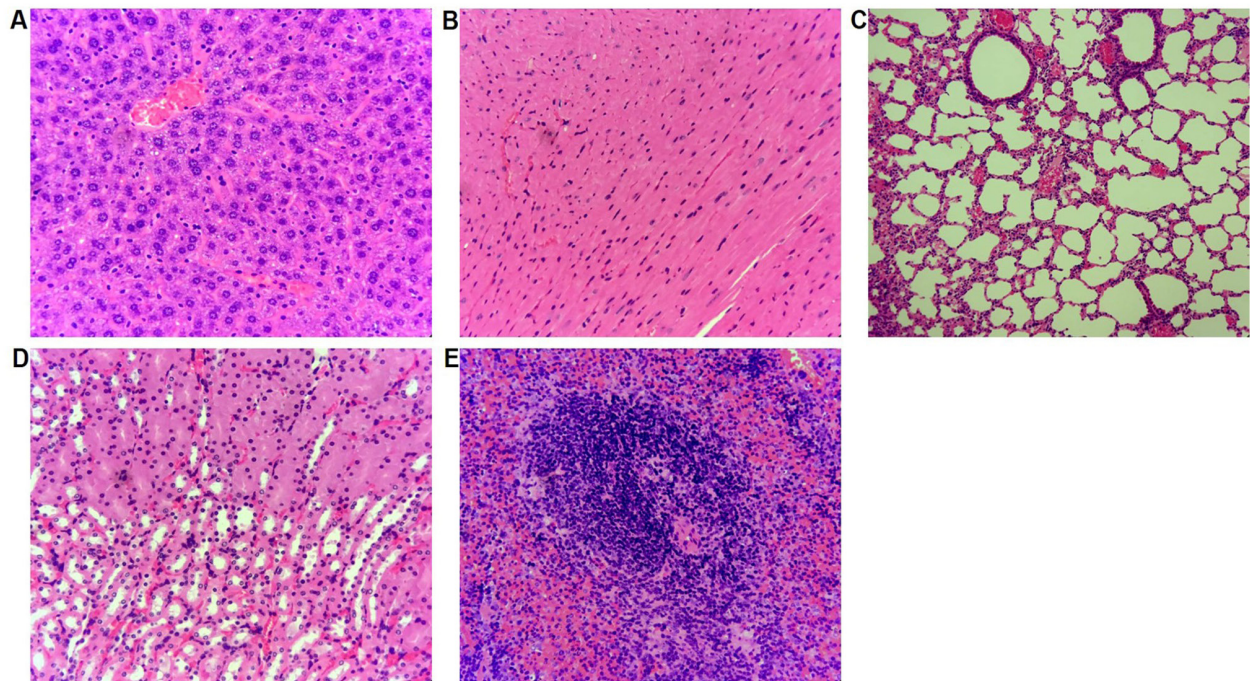

Supplement: Supplementary_Data.pdf [file Supplementary_Data.pdf]
